# Supplementary material for: Amplification of small molecule-inducible gene expression via tuning of intracellular receptor densities
Source: PubMed Central journal article supplement — Nucleic Acids Res. 2015 Jan 14;43(3):1955–64. doi: 10.1093/nar/gku1388 (PMC4330358; doi:10.1093/nar/gku1388), 2015-01-14
Supplement: supp_gku1388_nar-02992-x-2014-File007.pdf [file supp_gku1388_nar-02992-x-2014-File007.pdf]

## **Supporting Information for**

### **“Amplification of small molecule-inducible gene expression via tuning of intracellular receptor densities”**

Baojun Wang<sup>1\*</sup>, Mauricio Barahona<sup>2</sup> & Martin Buck<sup>3</sup>

<sup>1</sup>*Centre for Synthetic and Systems Biology, School of Biological Sciences, University of Edinburgh, Edinburgh, EH9 3JR, UK.*

<sup>2</sup>*Department of Mathematics, Faculty of Natural Sciences, Imperial College London, London, SW7 2AZ, UK.*

<sup>3</sup>*Department of Life Sciences, Faculty of Natural Sciences, Imperial College London, London, SW7 2AZ, UK.*

\*Corresponding author. Tel: 0044 -131-650-5527. Email: Baojun.Wang@ed.ac.uk

#### **Table of Contents**

Supplementary Methods – detailed Experimental Section

Supplementary Figures S1-S3

Supplementary Tables S1-S2

Supplementary References (1-10)

## Supplementary Methods

### Mathematical modelling and data fitting

Computational biochemical models were developed for individual transcription factor receptor modules to abstract their ligand-dependent signaling response behaviours. We focused on the average behaviour of the *E. coli* population to demonstrate the performance of the inducible gene expression systems at a steady state. The ordinary differential equation (ODE)-based deterministic model was used for accurately modelling the gene regulation and expression across the full input or output range of the system. The following describes the derivation of the transfer function (TF) for the small molecule-responsive gene expression module and the experimental data fitting to these models.

### Deriving transfer function of the ligand-responsive inducible promoters

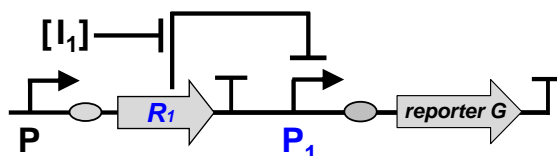

**Figure S1: Schematics showing architecture of the inducible negatively regulated promoter  $P_1$ .**

Figure S1 shows the exemplar architecture of the inducible promoter used in this study (*tetR- $P_{tet2}$* , *arsR- $P_{arsR}$*  and *araC- $P_{BAD}$*  promoters). The promoter  $P_1$  is negatively regulated by its constitutively expressed repressor  $R_1$  and is responsive to exogenous inducer  $I$  to activate transcription of downstream reporter gene  $G$ . The expression of the reporter can be modelled by<sup>2-4</sup>:

$$\frac{d[G]}{dt} = \alpha \cdot k_1 + \frac{k_1 \cdot [I]^n}{[I]^n + K_M^n} - d \cdot [G] \quad (S1)$$

where  $\alpha \cdot k_1$  is the basal constitutive activity of the promoter,  $k_1 \cdot [I]^n / ([I]^n + K_M^n)$  is the activity due to cooperative transcription activation by assuming the concentration of the repressor is constant to allow modelling of the effect of varying the concentration of the inducer  $I$ , and  $d \cdot [G]$  is the constitutive degradation activity of protein  $G$ .  $K_M$  and  $n$  are the Hill constant and coefficient relating to the promoter-regulator/inducer interaction,  $k_1$  is the maximum expression rate due to induction and  $\alpha$  is a constant relating to the promoter basal level due to leakage ( $0 \leq \alpha < 1$ ), and  $d$  is the degradation rate of  $G$ .

The steady state solution of equation S1 is given by

$$f([I]) = [G]_{ss} = k \cdot (\alpha + [I]^n / (K_M^n + [I]^n)) \quad (\text{S2})$$

where  $k = k_1/d$  represents the maximum expression level due to induction. Equation S2 gives the reporter protein level at steady state for the inducible promoter  $P_1$  and is also the TF of  $P_1$ . We used this TF to fit the characterisation data of the aTc (Fig. 2B), 3OC<sub>6</sub>HSL (Fig. 3A) and NaAsO<sub>2</sub> (Fig. 4A) inducible promoters using the nonlinear least square fitting function (cftool) in Matlab (MathWorks R2010a). The bestfit parameters and coefficients (with 95% confidence bounds) are listed in Table S2 and the parameterised TFs are plotted in Fig. 2B and Fig. 3A respectively against their experimental data.

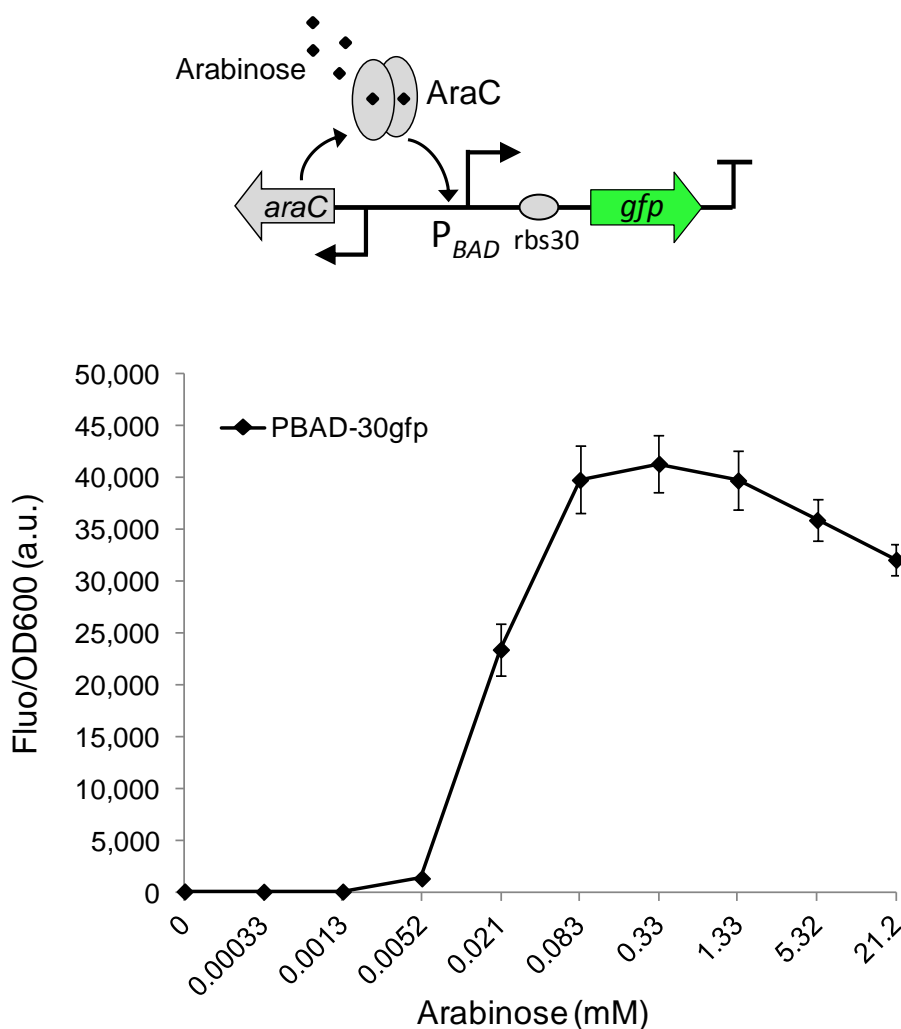

**Figure S2: The characterised dose response of the arabinose inducible  $P_{BAD}$  promoter.** The data were collected in *E. coli* TOP10 in LB media 6 hrs after induction by varying arabinose concentrations (0,  $1.3 \times 10^{-3}$ ,  $5.2 \times 10^{-3}$ ,  $2.1 \times 10^{-2}$ ,  $8.3 \times 10^{-2}$ , 0.33, 1.33, 5.32 and 21.2 mM). Error bars, s.d. (n = 3).

**A** Pc-30gfp-B15 cassette (J117)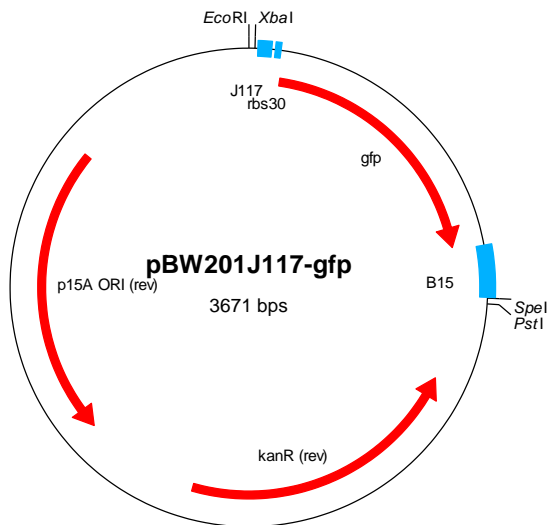pSB3K3 carrying *J117-30gfp-t***B** Pc (J117) controlled TetR expression cassette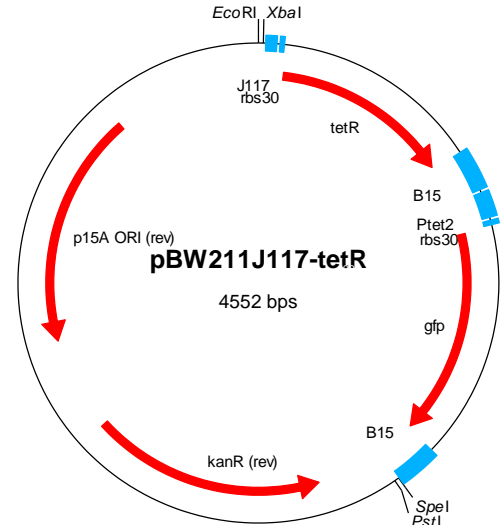pSB3K3 carrying *J117-30tetR-t-P<sub>tet2</sub>-30gfp-t***C** pBAD controlled TetR expression cassette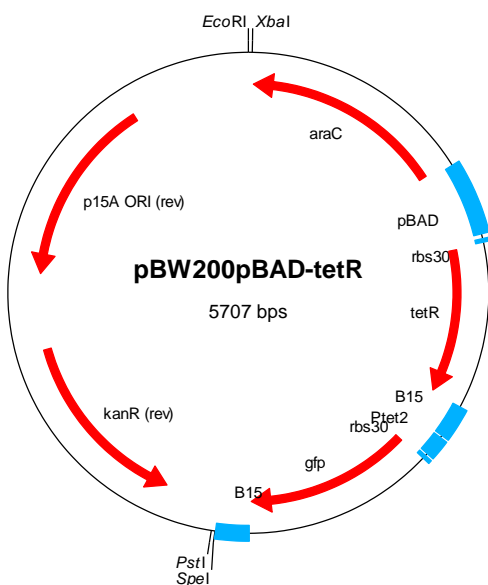pSB3K3 carrying *araC-P<sub>BAD</sub>-30tetR-t-P<sub>tet2</sub>-30gfp-t***D** pBAD controlled ArsR expression cassette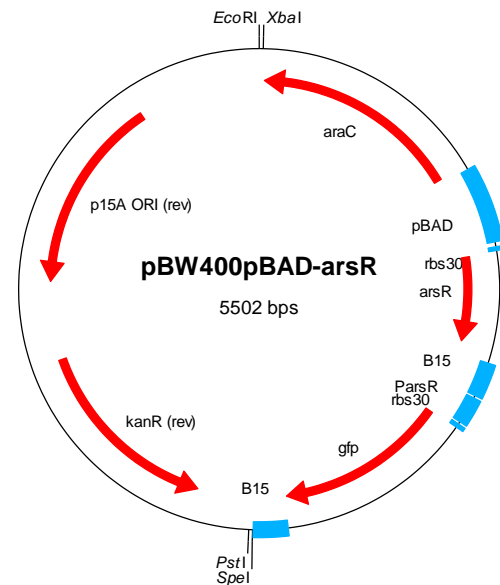pSB3K3 carrying *araC-P<sub>BAD</sub>-30arsR-t-P<sub>arsR</sub>-30gfp-t***Figure S3: Representative plasmid circuits used for sensor dose response characterisation.**

(A) Plasmid used for characterising constitutive promoter (e.g. J117, Fig. 2A). (B-C) Plasmids used for characterising aTc sensor response with the receptor TetR expressed from either a constitutive promoter (e.g. J117, Fig. 2B) or the arabinose inducible  $P_{BAD}$  promoter (Fig. 2C). (D) Plasmids used for characterising arsenic sensor response with the receptor ArsR expressed from the  $P_{BAD}$  promoter (Fig. 4C).

**Table S1: List of plasmid circuit constructs used in this study**

| Plasmid          | Description                                                                        | Reference                  |
|------------------|------------------------------------------------------------------------------------|----------------------------|
| pSB3K3           | BioBrick vector, p15A ori, Kan <sup>r</sup>                                        | iGEM Registry <sup>5</sup> |
| pBW110pBAD       | pSB3K3 carrying <i>araC</i> -P <sub>BAD</sub>                                      | This study                 |
| pBW111pBAD-gfp   | pSB3K3 carrying <i>araC</i> -P <sub>BAD</sub> -30gfp-t                             | This study                 |
| pBW201J117-gfp   | pSB3K3 carrying <i>J117</i> -30gfp-t                                               | This study                 |
| pBW202J114-gfp   | pSB3K3 carrying <i>J114</i> -30gfp-t                                               | This study                 |
| pBW204J115-gfp   | pSB3K3 carrying <i>J115</i> -30gfp-t                                               | This study                 |
| pBW205J105-gfp   | pSB3K3 carrying <i>J105</i> -30gfp-t                                               | This study                 |
| pBW206J106-gfp   | pSB3K3 carrying <i>J106</i> -30gfp-t                                               | This study                 |
| pBW206J101-gfp   | pSB3K3 carrying <i>J101</i> -30gfp-t                                               | This study                 |
| pBW211J117-tetR  | pSB3K3 carrying <i>J117</i> -30tetR-t-P <sub>tet2</sub> -30gfp-t                   | This study                 |
| pBW212J114-tetR  | pSB3K3 carrying <i>J114</i> -30tetR-t-P <sub>tet2</sub> -30gfp-t                   | This study                 |
| pBW213J115-tetR  | pSB3K3 carrying <i>J115</i> -30tetR-t-P <sub>tet2</sub> -30gfp-t                   | This study                 |
| pBW214J105-tetR  | pSB3K3 carrying <i>J105</i> -30tetR-t-P <sub>tet2</sub> -30gfp-t                   | This study                 |
| pBW215J106-tetR  | pSB3K3 carrying <i>J106</i> -30tetR-t-P <sub>tet2</sub> -30gfp-t                   | This study                 |
| pBW216J101-tetR  | pSB3K3 carrying <i>J101</i> -30tetR-t-P <sub>tet2</sub> -30gfp-t                   | This study                 |
| pBW200pBAD-tetR  | pSB3K3 carrying <i>araC</i> -P <sub>BAD</sub> -30tetR-t-P <sub>tet2</sub> -30gfp-t | This study                 |
| pBW311J117-luxR  | pSB3K3 carrying <i>J117</i> -30luxR-t-P <sub>lux2</sub> -30gfp-t                   | This study                 |
| pBW312J114-luxR  | pSB3K3 carrying <i>J114</i> -30luxR-t-P <sub>lux2</sub> -30gfp-t                   | This study                 |
| pBW313J115-luxR  | pSB3K3 carrying <i>J115</i> -30luxR-t-P <sub>lux2</sub> -30gfp-t                   | This study                 |
| pBW314J105-luxR  | pSB3K3 carrying <i>J105</i> -30luxR-t-P <sub>lux2</sub> -30gfp-t                   | This study                 |
| pBW315J106-luxR  | pSB3K3 carrying <i>J106</i> -30luxR-t-P <sub>lux2</sub> -30gfp-t                   | This study                 |
| pBW316J101-luxR  | pSB3K3 carrying <i>J101</i> -30luxR-t-P <sub>lux2</sub> -30gfp-t                   | This study                 |
| pBW300pBAD-luxR  | pSB3K3 carrying <i>araC</i> -P <sub>BAD</sub> -30luxR-t-P <sub>lux2</sub> -30gfp-t | This study                 |
| pBW413Pnull-arsR | pSB3K3 carrying <i>P<sub>null</sub></i> -30arsR-t-P <sub>arsR</sub> -gfp-t         | This study                 |
| pBW411J117-arsR  | pSB3K3 carrying <i>J117</i> -30arsR-t-P <sub>arsR</sub> -gfp-t                     | This study                 |
| pBW412J114-arsR  | pSB3K3 carrying <i>J114</i> -30arsR-t-P <sub>arsR</sub> -gfp-t                     | This study                 |
| pBW414J105-arsR  | pSB3K3 carrying <i>J105</i> -30arsR-t-P <sub>arsR</sub> -gfp-t                     | This study                 |
| pBW400pBAD-arsR  | pSB3K3 carrying <i>araC</i> -P <sub>BAD</sub> -30arsR-t-P <sub>arsR</sub> -30gfp-t | This study                 |

**Table S2. List of genetic parts and sequences used in this study** (promoters are in red, RBSs are in italic and bold, protein coding sequences are in brown and terminators are in bold)

| Part name                                                 | Type and source                                                          | DNA sequence (5' – 3')                                                                                                                                                                                                                                                                                                                                                                                                                                                                                                                                                                                                                                                                                                                                                                                                                                                                                                                                                                                                                                                                                           |
|-----------------------------------------------------------|--------------------------------------------------------------------------|------------------------------------------------------------------------------------------------------------------------------------------------------------------------------------------------------------------------------------------------------------------------------------------------------------------------------------------------------------------------------------------------------------------------------------------------------------------------------------------------------------------------------------------------------------------------------------------------------------------------------------------------------------------------------------------------------------------------------------------------------------------------------------------------------------------------------------------------------------------------------------------------------------------------------------------------------------------------------------------------------------------------------------------------------------------------------------------------------------------|
| <i>P<sub>J117</sub>-rbs30-tetR-B0015-P<sub>tet2</sub></i> | Inducible promoter with tetR receptor (de novo synthesized)              | <p>TTGACAGCTAGCTCAGTCCTAGGGATTGTGCTAGCTACTAGAG<b>ATTAAAGAGGAGAAA</b>TACCATATGTCCAGATTAGATAAAAAGTAAAGTGATTAACAGCGCATTAGAGCTGCTTAATGAGGTCGGAATCGAAGGTTTAAACAACCCGTAAACTCGCCAGAAGCTAGGTGTAGAGCAGCCTACATTGTATTGGCATGTAAAAAATAAGCGGGCTTTGCTCGACGCCTTAGCCATTGAGATGTTAGATAGGCACCATACTCACTTTTGCCCTTTAGAAAGGGGAAAGCTGGCAAGATTTTTTACGTAATAACGCTAAAAGTTTTAGATGTGCTTTACTAAGTCATCGCGATGGAGCAAAAAGTACATTTAGGTACACGGCCTACAGAAAAACAGTATGAAACTTCGAAAAATCAATTAGCCTTTTATGCCAACAAAGGTTTTTCACTAGAGAATGCATTATATGCACTCAGCGCTGTGGGCATTTTACTTTTAGGTTGCGTATTGGAAGATCAAGAGCATCAAGTTCGCTAAAGAAGAAAGGGAAACACCTACTACTGATAGTATGCCGCCATTATTACGACAAGCTATCGAATTATTTGATCACCAAGGTGCAGAGCCAGCCTTCTTATTTCGGCCTTGAATTGATCATTTGCGGATTAGAAAAACAACCTTAAATGTGAAAGTGGGTCCTAATAATACTAGAG<b>CCAGGCATCAAATAAAACGAAAGGCTCAGTCGAAAGACTGGGCCTTTCGTTTTATCTGTTGTTTGTTCGGTGAACGCTCTCTACTAGAGTCACACTGGCTCACCTTCGGGTGGGCCTTTCTGCGTTTTATA</b>TACTAGAGTTTTTCAGCAGGACGCACCTGACCTCCCTATCAGTGATAGAGATTGACATCCCTATCAGTGATAGAGATACTGAGCACATAT</p>                                                                                                                              |
| <i>P<sub>J117</sub>-rbs30-luxR-B0015-P<sub>lux2</sub></i> | Inducible promoter with luxR receptor (de novo synthesized)              | <p>TTGACAGCTAGCTCAGTCCTAGGGATTGTGCTAGCTACTAGAG<b>ATTAAAGAGGAGAAA</b>TACTAGATGAAAAACATAAAATGCCGACGACACATACAGAATAATTAATAAAATTAAGCTTGTAGAAGCAATAATGATATTAATCAATGCTTATCTGATATGACTAAAATGGTACATTTGTGAATATTTACTCGCGATCATTTTAACTCATTTCTATGGTTAAATCTGATATTTCAATCCCTAGATAAATACCCTAAAAAATGGAGGCAATATTTATGATGACGCTAATTTAATAAAAATATGATCCTATAGTAGATTATTCTAACTCCAATCATTCCCAATTAATTGGAATATATTTGAAAACAATGCTGTAAATAAAAATCTCCAAATGTAATTAAGAAGCGAAAACATCAGGCTTATCACTGGGTTTAGTTTTCCCTATTCATACGGCTAACAATGGCTTCGGAATGCTTAGTTTTGACACATTCAGAAAAAGACAACCTATATAGATAGTTTTATTTTTACATGCGTGTATGAACATAACCATTAATTGTTCCCTTCTCTAGTTGATAATTATCGAAAAATAAATATAGCAAATAATAAATCAAACAACGATTTAACCAAAAGAGAAAAGAATGTTTAGCGTGGGCATGCGAAGGAAAAGCTCTTGGGATATTTCAAAAATATTAGGTTGCAGTGAGCGTACTGTCACTTTCCATTTAACCAATGCGCAAAATGAAACTCAATACAACAACCGCTGCCAAAGTATTTCTAAAGCAATTTTAAACAGGAGCAATTGATTGCCCATACTTTAAAAAATTAATAACACTGATAGTGC TAGTGTAGATCACTACTAGAG<b>CCAGGCATCAAATAAAACGAAAGGCTCAGTCGAAAGACTGGGCCTTTCGTTTTATCTGTTGTTTGTTCGGTGAACGCTCTCTACTAGAGTCACACTGGCTCACCTTCGGGTGGGCCTTTCTGCGTTTTATA</b>TACTAGACCTGTAGGATCGTACAGGTTTACGCAAGAAAATGGTTTTGTTACTTTCCGATAAA</p> |
| <i>P<sub>J117</sub>-rbs30-arsR-B0015-P<sub>arsR</sub></i> | Inducible promoter with ArsR receptor <sup>6</sup> (de novo synthesized) | <p>TTGACAGCTAGCTCAGTCCTAGGGATTGTGCTAGCTACTAGAG<b>ATTAAAGAGGAGAAA</b>TACTAGATGTCATTTCTGTTACCCATCCAATTTGTTCAAAATTTCTGCTGATGAAACCCGCTCGGGCATCGTTTTACTGCTCAGCGAACTGGGAGAGTTATGCGTCTGCGATCTCTGCACCTGCTCTCGACCAGTCGCAGCCCAAGATCTCCCGCCACCTGGCATTTGCTGCGTGAAGCGGGCTATTGCTGGACCGCAAGCAAGGTAAGTGGGTTTCAATACCCTTATCACCGCATATTTCCAGCATGGGCGGCGAAATTTATGATGAGGCTGGCGATGTGAACAGGAAAAGGTTTCAGGCGATTGTCGCAACCTGGCTCGACAAAACCTGTTCCGGGGACAGTAAGAACATTTGCAGTTAAAAATTTAGCTAAACACACATGAATTTTTCAGATGTGTTTTATCCGGGTACTAGAG<b>CCAGGCATCAAATAAAACGAAAGGCTCAGTCGAAAGACTGGGCCTTTCGTTTTATCTGTTGTTTGTTCGGTGAACGCTCTCTACTAGAGTCACACTGGCTCACCTTCGGGTGGGCCTTTCTGCGTTTTATA</b>TACTAGAGCCAACCTCAAATTTCAACCTATTACCTTCCCTGCACTTACACATTCGTTAAGTCATATATGTTTTGACTTATCCGCTTCGAAGAGAGACACTACCTGCAA</p>                                                                                                                                                                                                                                                                                                                                                  |

|                             |                                 |                                                                                                                                                                                                                                                                                                                                                                                                                                                                                                                                                                                                                                                                                                                                                                                                                                                                                                                                                                                                                                                                                                                                                                                                                                                                                                                          |
|-----------------------------|---------------------------------|--------------------------------------------------------------------------------------------------------------------------------------------------------------------------------------------------------------------------------------------------------------------------------------------------------------------------------------------------------------------------------------------------------------------------------------------------------------------------------------------------------------------------------------------------------------------------------------------------------------------------------------------------------------------------------------------------------------------------------------------------------------------------------------------------------------------------------------------------------------------------------------------------------------------------------------------------------------------------------------------------------------------------------------------------------------------------------------------------------------------------------------------------------------------------------------------------------------------------------------------------------------------------------------------------------------------------|
|                             |                                 | TTATGACAACCTTGACGGCTACATCATTCACTTTTTCTTCAACAACCGGCACGG<br>AACTCGCTCGGGCTGGCCCCGGTGCATTTTTTAAATACCCGCGAGAAATAGA<br>GTTGATCGTCAAACCAACATTGCGACCGACGGTGGCGATAGGCATCCGGGT<br>GGTGCTCAAAGCAGCTTCGCCCTGGCTGATACGTTGGTCCTCGCGCCAGCTT<br>AAGACGCTAATCCCTAACTGCTGGCGGAAAAGATGTGACAGACGCGACGGCG<br>ACAAGCAAACATGCTGTGCGACGCTGGCGATATCAAAATTGCTGTCTGCCAG<br>GTGATCGCTGATGTAAGCAAGCCTCGCGTACCCGATTATCCATCGGTGGA<br>TGGAGCGACTCGTTAATCGCTTCCATGCGCCGAGTAACAATTGCTCAAGCA<br>GATTTATCGCCAGCAGCTCCGAATAGCGCCCTTCCCTTGGCCGGCGTTAAT<br>GATTTGCCCAAACAGGTCGCTGAAATGCGGCTGGTGGCTTTCATCCGGGCGA<br>AGAACCCTGATTGGCAAATATTGACGGCCAGTTAAGCCATTCATGCCAGT<br>AGGCGCGCGGACGAAAGTAAACCCACTGGTGATACCATTGCGGAGCCTCCGG<br>ATGACGACCGTAGTGATGAATCTCTCCTGGCGGGAACAGCAAAATATCACCC<br>GGTCGGCAAACAAATTTCTCGTCCCTGATTTTTTACCACCCCTGACCGCGAA<br>TGGTGAGATTGAGAATATAACCTTTTCAATCCCAGCGGTGGTTCGATAAAAA<br>ATCGAGATAACCGTTGGCTCAATCGGCGTTAAACCCGCCACCAGATGGGCA<br>TTAAACGAGTATCCCGGCAGCAGGGGATCATTTTGGCGTTCAGCCATACTTT<br>TCATACTCCCGCCATTCAGAGAAGAAACCAATTGTCCATATTGCATCAGACA<br>TTGCCGTCCTGCGTCTTTTACTGGCTCTTCTCGCTAACCAAACCGGTAACC<br>CCGCTTATTTAAAAGCATTTCTGTAACAAGCGGGACCAAAGCCATGACAAAA<br>CGCGTAACAAAAGTGTCTATAATCACGGCAGAAAAGTCCACATTGATTATTT<br>GCACGGCGTCACACTTTGCTATGCCATAGCATTTTTATCCATAAGATTAGCG<br>GATCCTACCTGACGCTTTTTATCGCAACTCTCTACTGTTTTCTCCAT |
| <i>araC-P<sub>BAD</sub></i> | Inducible promoter <sup>7</sup> |                                                                                                                                                                                                                                                                                                                                                                                                                                                                                                                                                                                                                                                                                                                                                                                                                                                                                                                                                                                                                                                                                                                                                                                                                                                                                                                          |
| <i>rbs30</i>                | RBS <sup>3</sup>                | TCTAGAG <b>ATTAAAGAGGAGAAA</b> TACTAGATG                                                                                                                                                                                                                                                                                                                                                                                                                                                                                                                                                                                                                                                                                                                                                                                                                                                                                                                                                                                                                                                                                                                                                                                                                                                                                 |
| <i>J117</i>                 | Promoter <sup>8</sup>           | <u>TTGACAGCTAGCTCAGTCCTAGGGATTGTGCTAGC</u>                                                                                                                                                                                                                                                                                                                                                                                                                                                                                                                                                                                                                                                                                                                                                                                                                                                                                                                                                                                                                                                                                                                                                                                                                                                                               |
| <i>J114</i>                 | Promoter <sup>8</sup>           | <u>TTTATGGCTAGCTCAGTCCTAGGTACAATGCTAGC</u>                                                                                                                                                                                                                                                                                                                                                                                                                                                                                                                                                                                                                                                                                                                                                                                                                                                                                                                                                                                                                                                                                                                                                                                                                                                                               |
| <i>J115</i>                 | Promoter <sup>8</sup>           | <u>TTTATAGCTAGCTCAGCCCTGGTACAATGCTAGC</u>                                                                                                                                                                                                                                                                                                                                                                                                                                                                                                                                                                                                                                                                                                                                                                                                                                                                                                                                                                                                                                                                                                                                                                                                                                                                                |
| <i>J105</i>                 | Promoter <sup>8</sup>           | <u>TTTACGGCTAGCTCAGTCCTAGGTACTATGCTAGC</u>                                                                                                                                                                                                                                                                                                                                                                                                                                                                                                                                                                                                                                                                                                                                                                                                                                                                                                                                                                                                                                                                                                                                                                                                                                                                               |
| <i>J106</i>                 | Promoter <sup>8</sup>           | <u>TTTACGGCTAGCTCAGTCCTAGGTATAGTGCTAGC</u>                                                                                                                                                                                                                                                                                                                                                                                                                                                                                                                                                                                                                                                                                                                                                                                                                                                                                                                                                                                                                                                                                                                                                                                                                                                                               |
| <i>J101</i>                 | Promoter <sup>8</sup>           | <u>TTTACAGCTAGCTCAGTCCTAGGTATTATGCTAGC</u>                                                                                                                                                                                                                                                                                                                                                                                                                                                                                                                                                                                                                                                                                                                                                                                                                                                                                                                                                                                                                                                                                                                                                                                                                                                                               |
| B0015 (B15)                 | Terminator <sup>9</sup>         | <b>CCAGGCATCAAATAAAACGAAAGGCTCAGTCGAAAGACTGGGCCTTTTCGTTT<br/>TATCTGTTGTTTGTGCGGTGAACGCTCTCTACTAGAGTCACACTGGCTCACCT<br/>TCGGGTGGGCCTTTCTGCGTTTATA</b>                                                                                                                                                                                                                                                                                                                                                                                                                                                                                                                                                                                                                                                                                                                                                                                                                                                                                                                                                                                                                                                                                                                                                                     |
| <i>gfp</i>                  | Gene <sup>3,10</sup>            | ATGCGTAAAGGAGAAGAACTTTTTCACTGGAGTTGTCCCAATTCTTGTTGAAT<br>TAGATGGTGATGTTAATGGGCACAAATTTTTCTGTGTCAGTGGAGAGGGTGAAGG<br>TGATGCAACATACGGAAAACCTTACCCTTAAATTTATTTGCACTACTGGAAAA<br>CTACCTGTTCCATGGCCAACACTTGTCACTACTTTTCGGTTATGGTGTTC AAT<br>GCTTTGCGAGATACCCAGATCATATGAAACAGCATGACTTTTTCAAGAGTGC<br>CATGCCCCGAAGGTTATGTACAGGAAAGAACTATATTTTTCAAAGATGACGGG<br>AACTACAAGACACGTGCTGAAGTCAAGTTTGAAGGTGATACCCTTGTTAATA<br>GAATCGAGTTAAAAGGTATTGATTTTTAAAGAAGATGGAAACATTTCTGGACA<br>CAAATTGGAATACAACATAAATCACACAATGTATACATCATGGCAGACAAA<br>CAAAAGAATGGAATCAAAGTTAACTTCAAATTTAGACACAACATTTGAAGATG<br>GAAGCGTTCAACTAGCAGACCATTTATCAACAAAATACTCCAATTGGCGATGG<br>CCCTGTCTTTTTACCAGACAACCATTTACCTGTCCACACAATCTGCCCTTTTCG<br>AAAGATCCCAACGAAAAGAGAGACCACATGGTCTTCTTGAGTTTGTAACAG<br>CTGCTGGGATTACACATGGCATGGATGAACTATACAAATAATAA                                                                                                                                                                                                                                                                                                                                                                                                                                                                                                          |

*pSB3K3*Plasmid  
backbone<sup>1,5</sup>

---

```
TACTAGTAGCGGCCGCTGCAGTCCGGCAAAAAACGGGCAAGGTGTCACCACCTGCC
CTTTTTCTTTAAAACCGAAAAGATTACTTCGCGTTATGCAGGCTTCCTCGCTCACTGA
CTCGCTGCGCTCGGTGCTTCGGCTGCGGCGAGCGGTATCAGCTCACTCAAAGGCGGTA
ATCTCGAGTCCCGTCAAGTCAGCGTAATGCTCTGCCAGTGTACAACCAATTAACCAA
TTCTGATTAGAAAAACTCATCGAGCATCAAATGAAACTGCAATTTATTCATATCAGGA
TTATCAATACCATATTTTTGAAAAAGCCGTTTCTGTAATGAAGGAGAAAACTCACCGA
GGCAGTTCCATAGGATGGCAAGATCCTGGTATCGGTCTGCGATTCCGACTCGTCCAAC
ATCAATACAACCTATTAATTTCCCTCGTCAAAAATAAGGTTATCAAGTGAGAAATCA
CCATGAGTGACGACTGAATCCGGTGAGAATGGCAAAAGCTTATGCATTTCTTTCCAGA
CTTGTTCAACAGGCCAGCCATTACGCTCGTCAAAAATCACTCGCATCAACCAAACC
GTTATTCATTCGTGATTGCGCCTGAGCGAGACGAAATACCGCATCGCTGTTAAAAGGA
CAATTACAAACAGGAATCGAATGCAACCGGCGCAGGAACACTGCCAGCGCATCAACAA
TATTTTCACCTGAATCAGGATATTTCTTAATACCTGGAATGCTGTTTTCCCGGGGAT
CGCAGTGGTGAGTAACCATGCATCATCAGGAGTACGGATAAAAATGCTTGATGGTCGGA
AGAGGCATAAATCCGTGACCCAGTTTAGTCTGACCATCTCATCTGTAACATCATTGG
CAACGCTACCTTTGCCATGTTTCAGAAAACAACCTCTGGCGCATCGGGCTTCCCATACAA
TCGATAGATTGTCGCACCTGATTGCCCGACATTATCGCGAGCCATTTATACCCATAT
AAATCAGCATCCATGTTGGAATTTAATCGCGGCCCTCGAGCAAGACGTTTCCCGTTGAA
TATGGCTCATAACACCCCTTGATTAATGTTTATGTAAGCAGACAGTTTTATTGTTCA
TGATGATATATTTTTATCTTGTCGAATGTAACATCAGAGATTTTGAGACACAACGTGG
CTTTGTTGAATAAATCGAACTTTTGCTGAGTTGAAGGATCAGATCACGCATCTTCCCG
ACAACGCAGACCGTTCCGTGGCAAAGCAAAAGTTCAAAATCACCAACTGGTCCACCTA
CAACAAAGCTCTCATCAACCGTGGCTCCCTCACTTTCTGGCTGGATGATGGGGCGATT
CAGGCCTGGTATGAGTCAGCAACACCTTCTTACGAGGCAGACCTCAGCGCTAGCGGA
GTGTATACTGGCTTACTATGTTGGCACTGATGAGGGTGTGAGTGAAGTGTTCATGTG
GCAGGAGAAAAAAGGCTGCACCGGTGCGTCAGCAGAATATGTGATACAGGATATATTC
CGCTTCTCGCTCACTGACTCGTACGCTCGGTGCTTCGACTGCGGCGAGCGGAAATG
GCTTACGAACGGGGCGGAGATTTCTGGAAGATGCCAGGAAGATACTTAACAGGGAAG
TGAGAGGGCCCGGCAAAGCCGTTTTTCCATAGGCTCCGCCCCCTGACAAGCATCAC
GAAATCTGACGCTCAAATCAGTGGTGGCGAAACCCGACAGGACTATAAAGATACCAGG
CGTTTCCCTGCGGCTCCCTCGTGCCTCTCCTGTTCCCTGCTTTCCGTTTACCAGT
GTCATTCGCTGTTATGGCCGCTTTGTCTCATTTCCACGCTGACACTCAGTTCGGGG
TAGGCAGTTCGCTCCAAGCTGGACTGTATGCACGAACCCCGTTTTCAGTCCGACCGCT
GCGCCTTATCCGGTAACATATCGTCTTGAGTCCAACCCGAAAGACATGCAAAAGCACC
ACTGGCAGCAGCCACTGGTAATTGATTTAGAGGAGTTAGTCTTGAAGTCATGCGCCGG
TTAAGGCTAAACTGAAAGGACAAGTTTTGGTACTGCGCTCCTCCAAGCCAGTTACCT
CGGTTCAAAGAGTTGGTAGCTCAGAGAACCTTCGAAAACCGCCCTGCAAGGCGGTTTT
TTTCGTTTTTCAGAGCAAGAGATTACGCGCAGACCAAAACGATCTCAAGAAGATCATCT
TATTAAGGGGTCTGACGCTCAGTGGAAACGAAAACCTCACGTTAAGGGATTTTGGTCATG
AGATTATCAAAAAGGATCTTACCTAGATCCTTTTAAATTAATAAATGAAGTTTTAAAT
CAATCTAAAGTATATATGAGTAACTTGGTCTGACAGTTACCAATGCTTAATCAGTGA
GGCACCTATCTCAGCGATCTGTCTATTTTCGTTTCATCCATAGTTGCCTGACTCCCGTC
GTGTAGATAACTACGATACGGGAGGGCTTACCATCTGGCCCCAGTGTGCAATGATAC
CGCGAGACCCACGCTCACCAGCTCCAGATTTATCAGCAATAAACCAGCCAGCCGGAAG
GGCCGAGCGCAGAAGTGGTCTGCAACTTTATCCGCTCCATCCAGTCTATTTCCATGG
TGCCACCTGACGCTAAGAAACCATTATTATCATGACATTAACCTATAAAAAATAGGCG
TATCACGAGGCAGAATTTAGATAAAAAAATCCTTAGCTTTCGCTAAGGATGATTTCC
TGAATTCGCGGCCGCTTCTAGAG
```

---



**Supplementary References**

- 1 Shetty, R., Endy, D. & Knight, T. Engineering BioBrick vectors from BioBrick parts. *J. Biol. Eng.* **2**, 5 (2008).
- 2 Alon, U. *An Introduction To Systems Biology: Design Principles Of Biological Circuits*. (Chapman & Hall/CRC, 2007).
- 3 Zoltan, S., Jörg, S. & Vipul, P. *System Modeling In Cell Biology: From Concepts To Nuts And Bolts*. (The MIT Press, 2006).
- 4 Wang, B., Kitney, R. I., Joly, N. & Buck, M. Engineering modular and orthogonal genetic logic gates for robust digital-like synthetic biology. *Nat. Commun.* **2**, 508 (2011).
- 5 *pSB3K3 plasmid backbone*, <<http://parts.igem.org/Part:pSB3K3>> (2013).
- 6 Diorio, C., Cai, J., Marmor, J., Shinder, R. & DuBow, M. S. An Escherichia coli chromosomal ars operon homolog is functional in arsenic detoxification and is conserved in gram-negative bacteria. *J. Bacteriol.* **177**, 2050-2056 (1995).
- 7 Guzman, L., Belin, D., Carson, M. & Beckwith, J. Tight regulation, modulation, and high-level expression by vectors containing the arabinose PBAD promoter. *J. Bacteriol.* **177**, 4121-4130 (1995).
- 8 *Constitutive promoter family catalog*, <<http://parts.igem.org/Promoters/Catalog/Anderson>> (2013).
- 9 *B0015 double terminator*, <[http://parts.igem.org/Part:BBa\\_B0015](http://parts.igem.org/Part:BBa_B0015)> (2013).
- 10 *Green fluorescent protein derived from jellyfish Aequorea victoria* <[http://parts.igem.org/Part:BBa\\_E0040](http://parts.igem.org/Part:BBa_E0040)> (2013).
